# Supplementary figures and images for: Depth of tumor implantation affects response to in situ vaccination in a syngeneic murine melanoma model
Source: HighWire-hosted journal article supplement (doi:10.1136/jitc-2020-002107), 2021-04-01

# Supplemental Figure 1

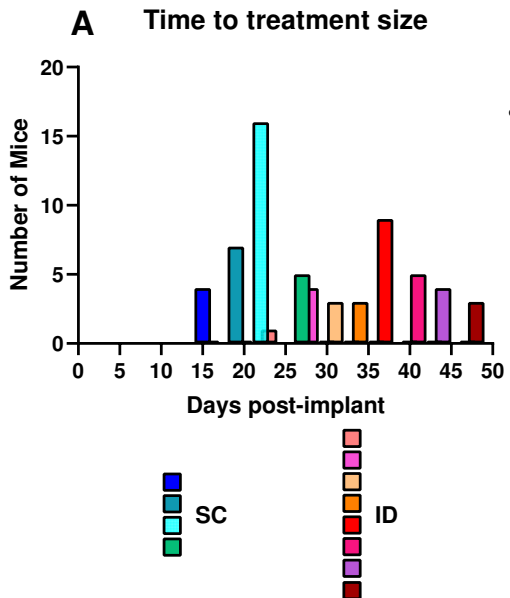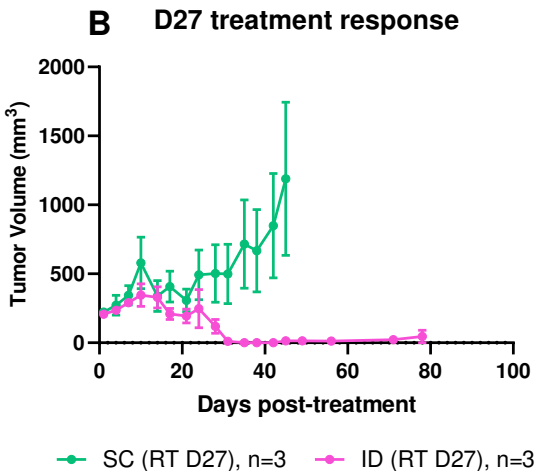

Supplement: jitc-2020-002107supp001_data_supplement.pdf [file jitc-2020-002107supp001_data_supplement.pdf]
